# Supplementary material for: A comparative study for the inactivation of multidrug resistance bacteria using dielectric barrier discharge and nano-second pulsed plasma
Source: PubMed Central journal article supplement (PMC4563361; doi:10.1038/srep13849), 2015-09-09
Supplement: srep13849-s1.pdf [file srep13849-s1.pdf]

## **A comparative study for the inactivation of multidrug resistance bacteria using dielectric barrier discharge and nano-second pulsed plasma**

Ji Hoon Park<sup>1</sup>, Naresh Kumar<sup>1</sup>, Dae Hoon Park<sup>1</sup>, Maksudbek Yusupov<sup>2</sup>, Erik C. Neyts<sup>2</sup>, Christof C. W. Verlact<sup>2</sup>, Annemie Bogaerts<sup>2</sup>, Min Ho Kang<sup>1</sup>, Han Sup Uhm<sup>1</sup>, Eun Ha Choi<sup>1</sup>, Pankaj Attri<sup>1</sup>

<sup>1</sup>*Plasma Bioscience Research Center / Department of Electrical and Biological Physics, Kwangwoon University, Seoul, Korea 139-701.*

<sup>2</sup>*Research Group PLASMANT, Department of Chemistry, University of Antwerp, Universiteitsplein 1, 2610 Antwerp, Belgium*

**Figure S1:** (a) Voltage and current graph for NPP; (b) Voltage and current graph for Ar-DBD; (c) Temperature and (d) pH of the saline solution after the 4<sup>th</sup> discharge of NPP and 5 min Ar-DBD treatment. All values are expressed as  $\pm$  SD in triplicates.

**Figure S2:** Determination of (a) H<sub>2</sub>O<sub>2</sub> concentration, (b) OH radical, (c) NO radical in 1 ml saline after the 4<sup>th</sup> discharge of NPP and 5 min Ar-DBD treatment. All values are expressed as  $\pm$  SD in triplicates. Students't-test was performed to control (\* denotes P<0.05 and \*\* denotes P<0.01)

**Figure S3:** Shockwaves analysis by calculating the voltage as function of time.

**Figure S4:** SEM image of the Penicillium-resistant, Methicillin-resistant and Gentamicin-resistant *S. aureus* bacteria after the 4<sup>th</sup> discharge of NPP and 5 min Ar-DBD treatment.

**Figure S5:** C 1s XPS data of the wild type *S. aureus* (a) control, (b) after the 5 min Ar-DBD treatment and (c) after the 4<sup>th</sup> discharge of NPP.

**Figure S6:** O 1s XPS data of the wild type *S. aureus* (a) control, (b) after the 5 min Ar-DBD treatment and (c) after the 4<sup>th</sup> discharge of NPP.

**Figure S7:** C 1s XPS data of the Penicillium-resistant *S. aureus* (a) control, (b) after the 5 min Ar-DBD treatment and (c) after the 4<sup>th</sup> discharge of NPP.

**Figure S8:** O 1s XPS data of the Penicillium-resistant *S. aureus* (a) control, ((b) after the 5 min Ar-DBD treatment and (c) after the 4<sup>th</sup> discharge of NPP.

**Figure S9:** C 1s XPS data of the Methicillin-resistant *S. aureus* (a) control, (b) after the 5 min Ar-DBD treatment and (c) after the 4<sup>th</sup> discharge of NPP.

**Figure S10:** O 1s XPS data of the Methicillin-resistant *S. aureus* (a) control, (b) after the 5 min Ar-DBD treatment and (c) after the 4<sup>th</sup> discharge of NPP.

**Figure S11:** C 1s XPS data of the Gentamicin-resistant *S. aureus* (a) control, (b) after the 5 min Ar-DBD treatment and (c) after the 4<sup>th</sup> discharge of NPP.

**Figure S12:** C 1s XPS data of the Gentamicin-resistant *S. aureus* (a) control, (b) after the 5 min Ar-DBD treatment and (c) after the 4<sup>th</sup> discharge of NPP.

**Figure S13:** Inactivation of wild type and multidrug resistance bacterial strains of *S. aureus* by the different pH solution. All values are expressed as  $\pm$  SD in triplicates.

**Figure S14:** Inactivation of wild type and multidrug resistance bacterial strains of *S. aureus* by the Ozone treatment for 30 s (inside the solution and 10 mm above the solution). All values are expressed as  $\pm$  SD in triplicates.

**Figure S15:** Amount of Ozone produced for 5 min in Ar-DBD. All values are expressed as  $\pm$  SD in triplicates.

**Figure S16:** Inactivation of wild type and multidrug resistance bacterial strains of *S. aureus* by the pH 4 solution with 50  $\mu$ M H<sub>2</sub>O<sub>2</sub>. All values are expressed as  $\pm$  SD in triplicates.

**Table S1.** Primers used in expression analysis

| Name  | Forward sequence            | Reverse sequence             |
|-------|-----------------------------|------------------------------|
| MecA  | ATGAGATTAGGCATCGTTC<br>C    | TGGATGACAGTACCTGAG<br>CC     |
| MecI  | CTGCAGAATGGGAAGTTA<br>TG    | TTACAAGTGAATTGAAACC<br>GCAGA |
| mecRI | CAAAGCACCGTTACTATC<br>TGC   | GAGTAAATTTTGGTCGAAT<br>GCTA  |
| femA  | ACAATGATGGCGAGATTA<br>CAGGA | ACC GCTAAAGGTACTAAC<br>AACAT |
| 16S   | AGAGCAAGCGGACCTCAT<br>AA    | TTCATGGAGTCGAGTTGCA<br>G     |

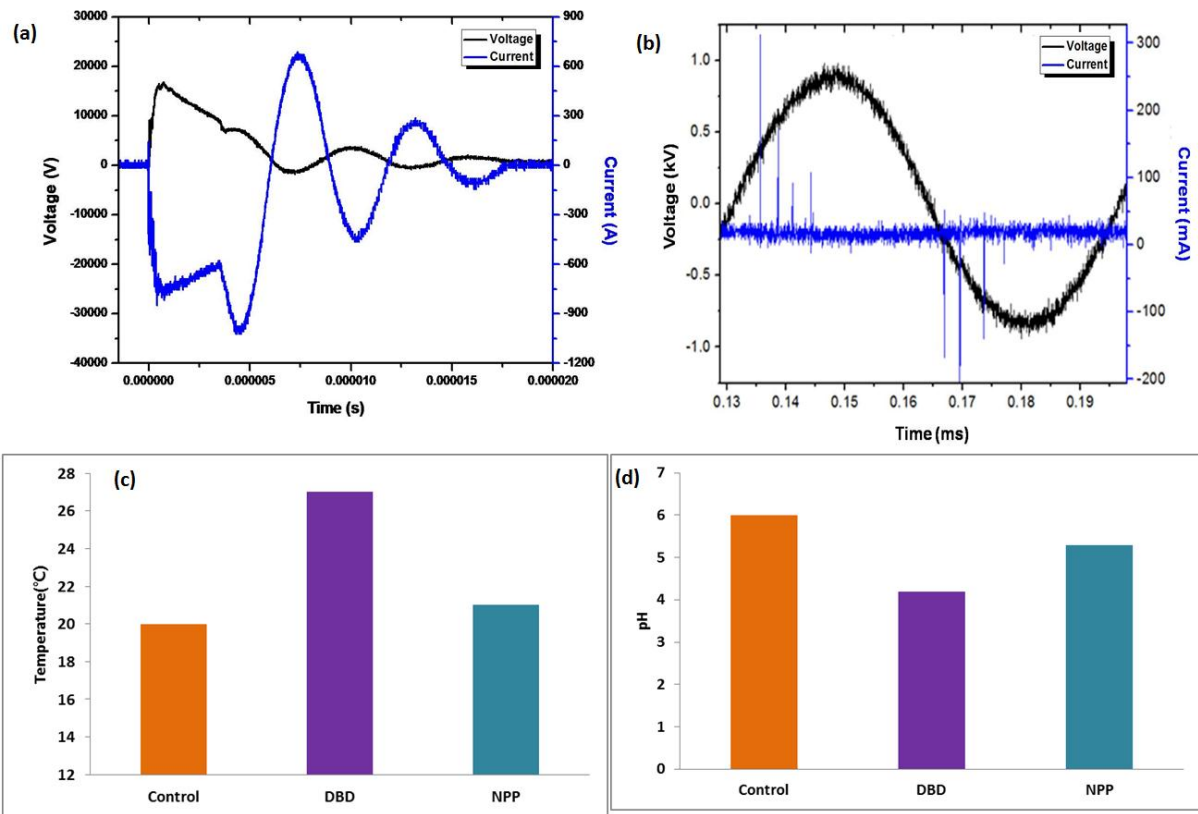

Figure S1

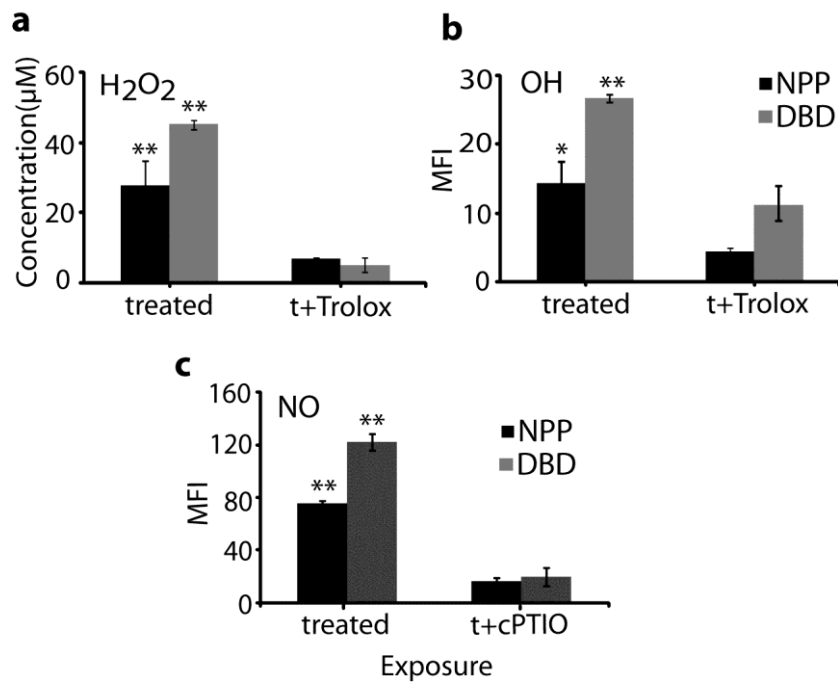

Figure S2

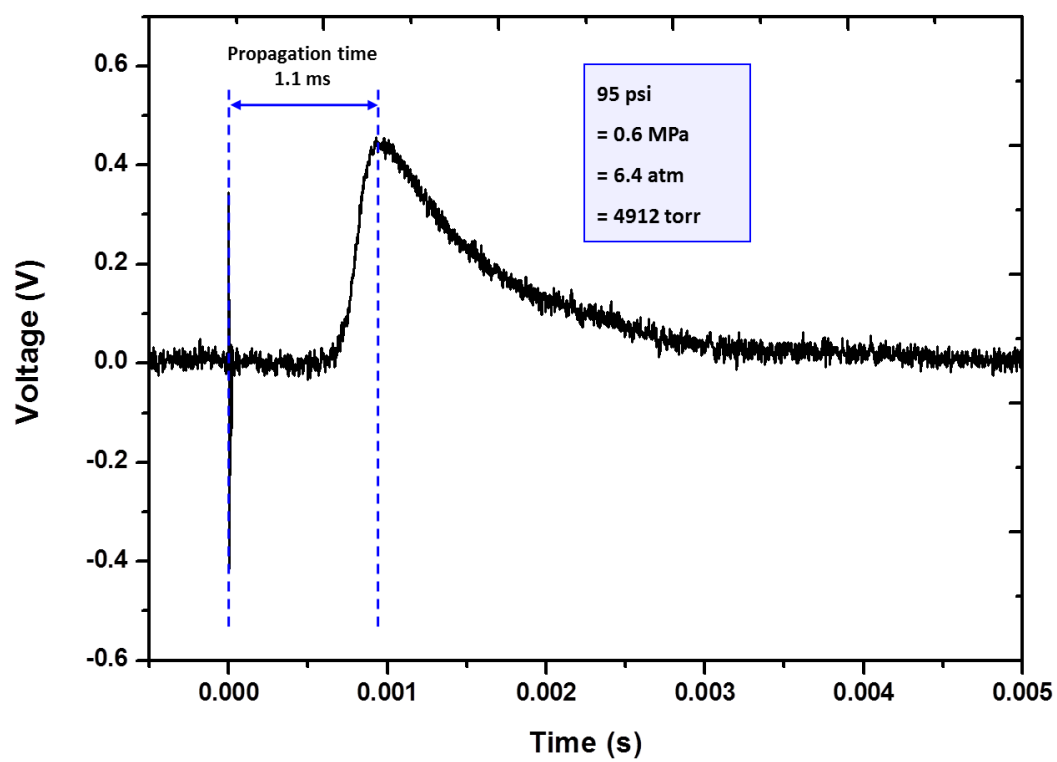

Figure S3

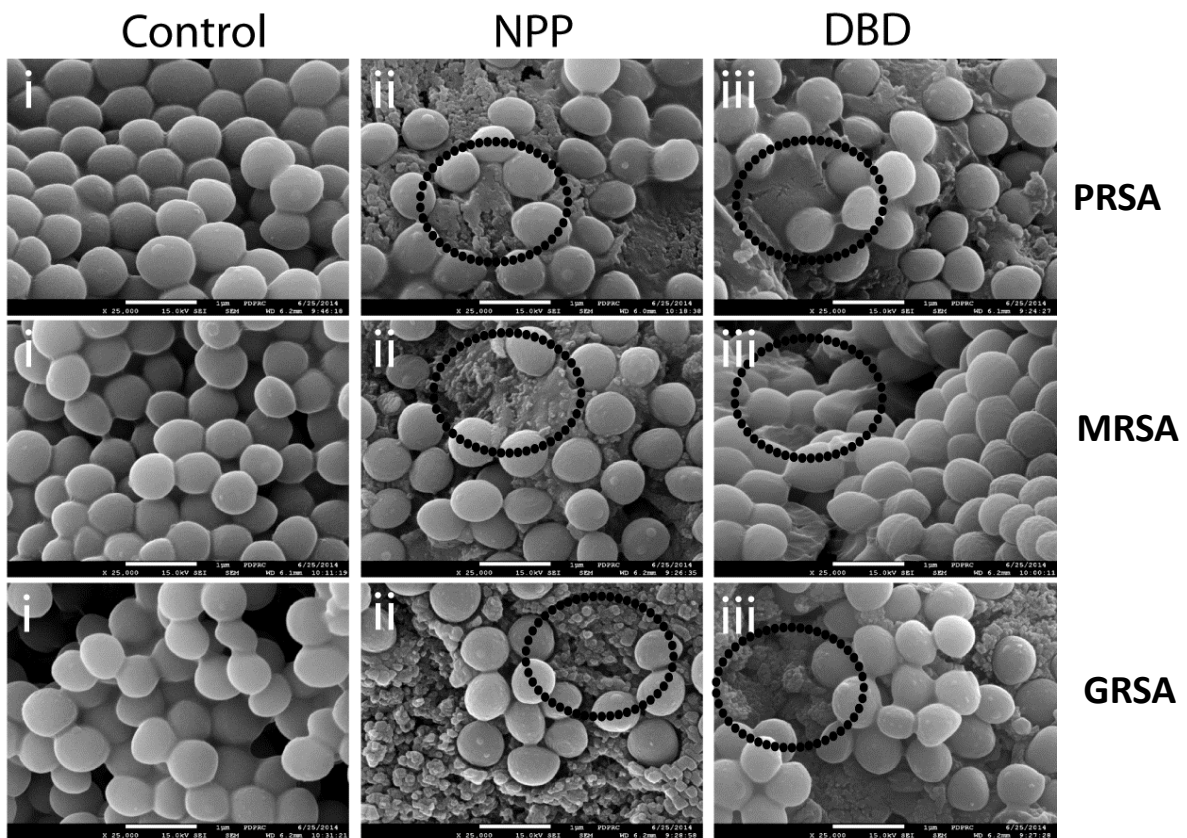

**Figure S4.**

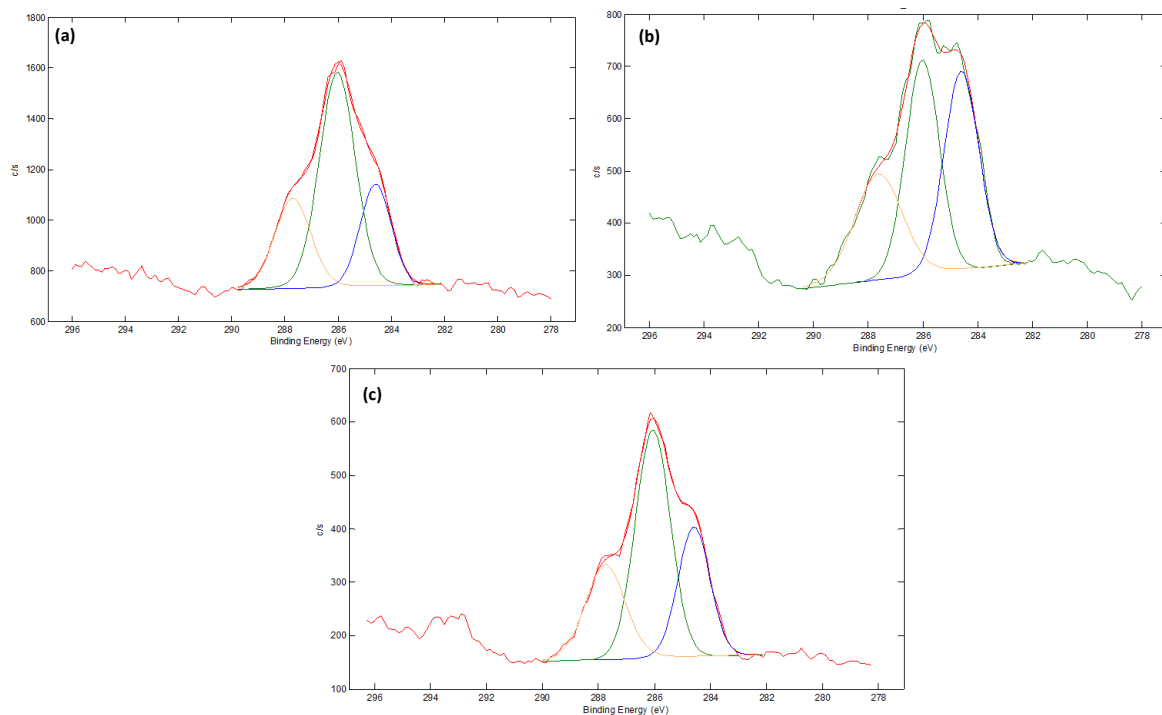

**Figure S5.**

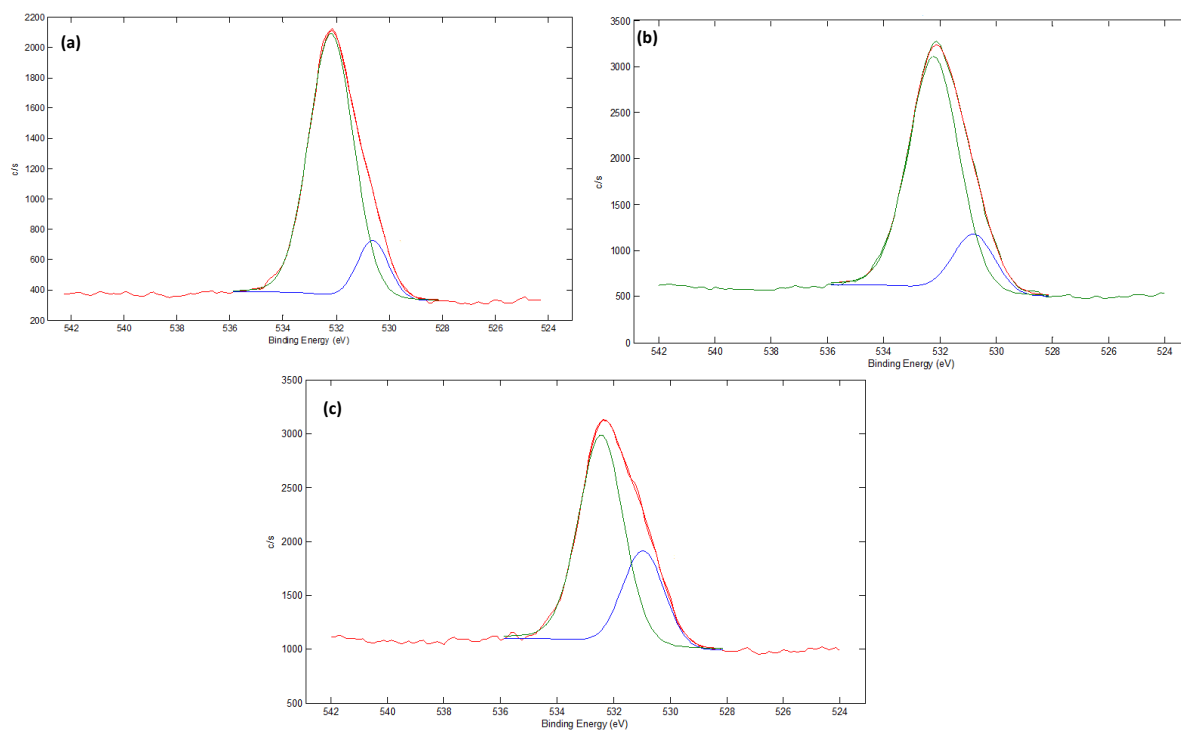

**Figure S6.**

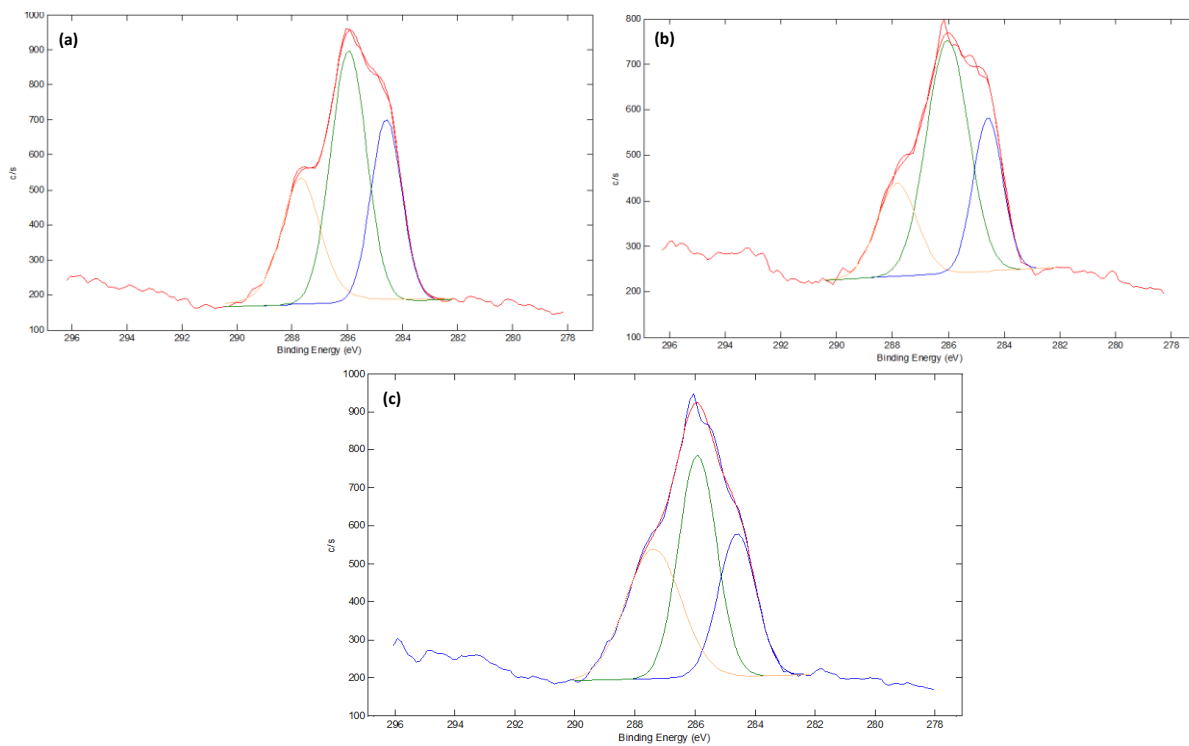

**Figure S7.**

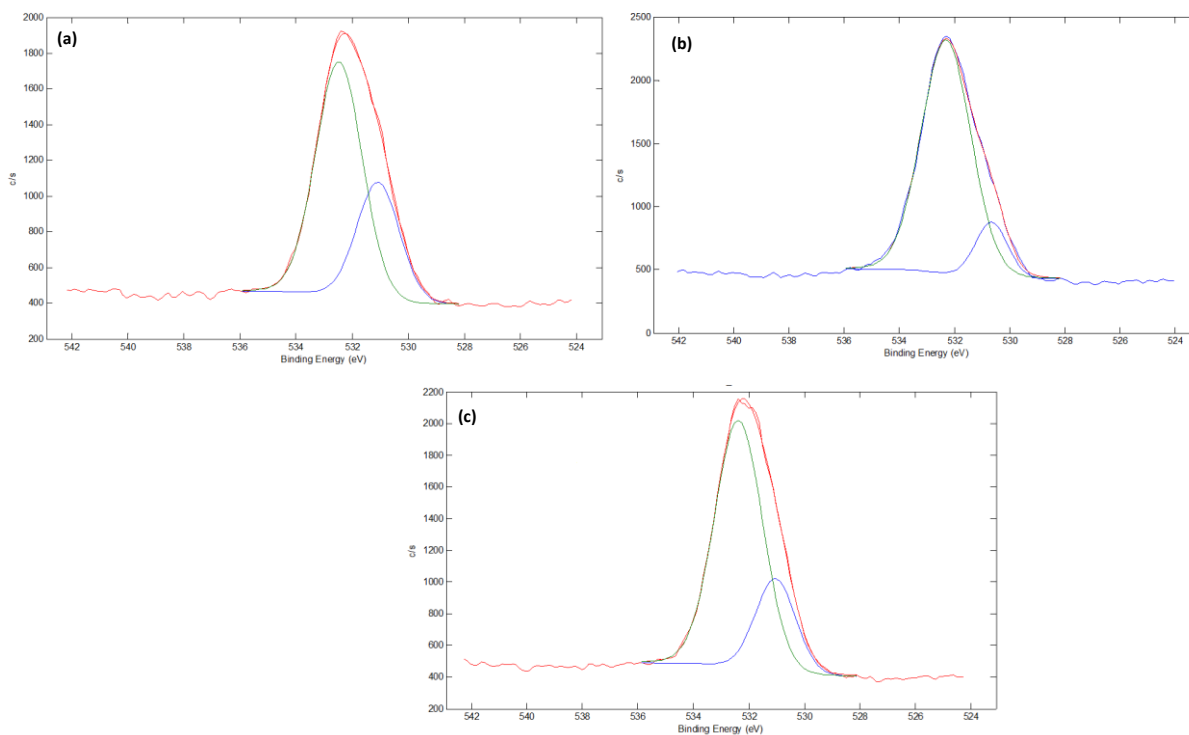

**Figure S8.**

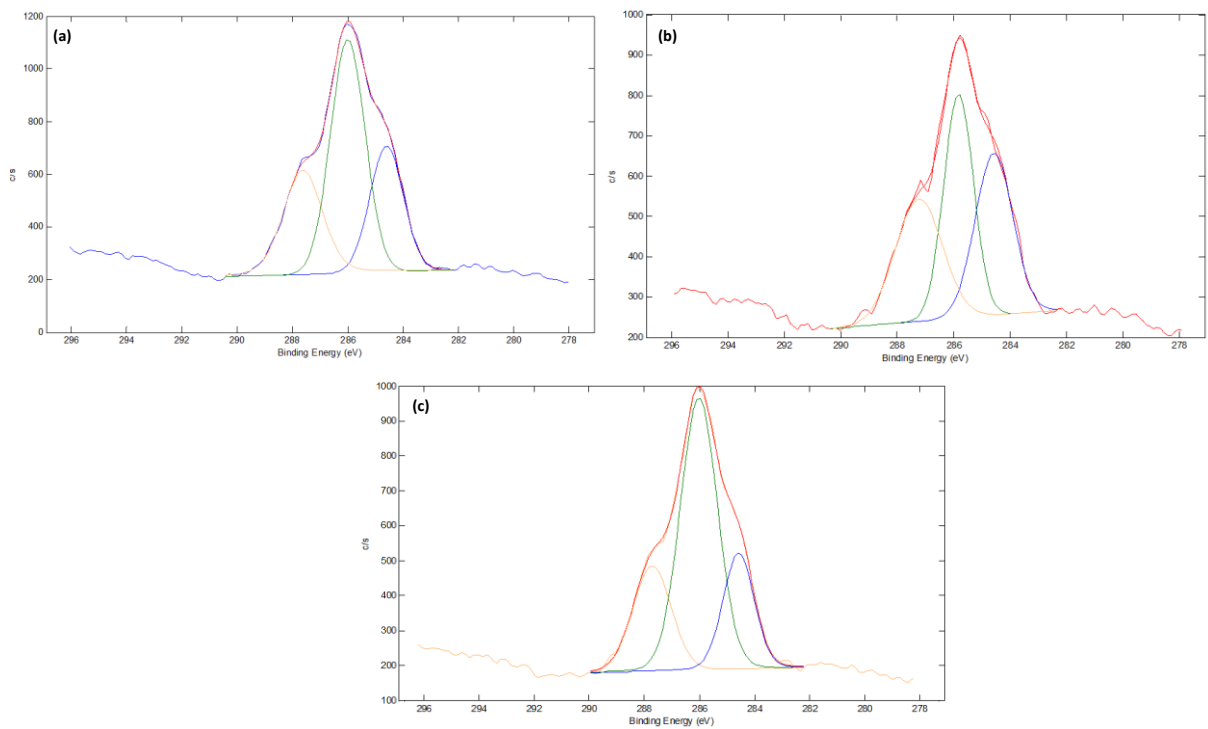

**Figure S9.**

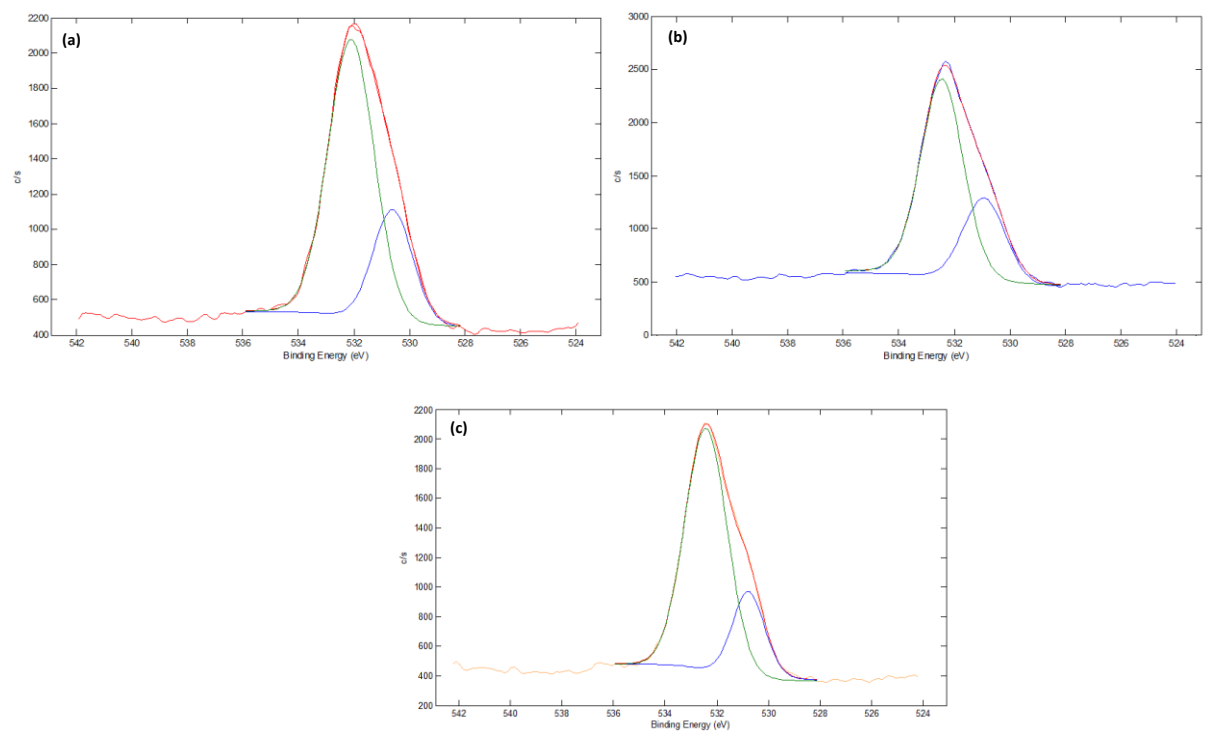

**Figure S10.**



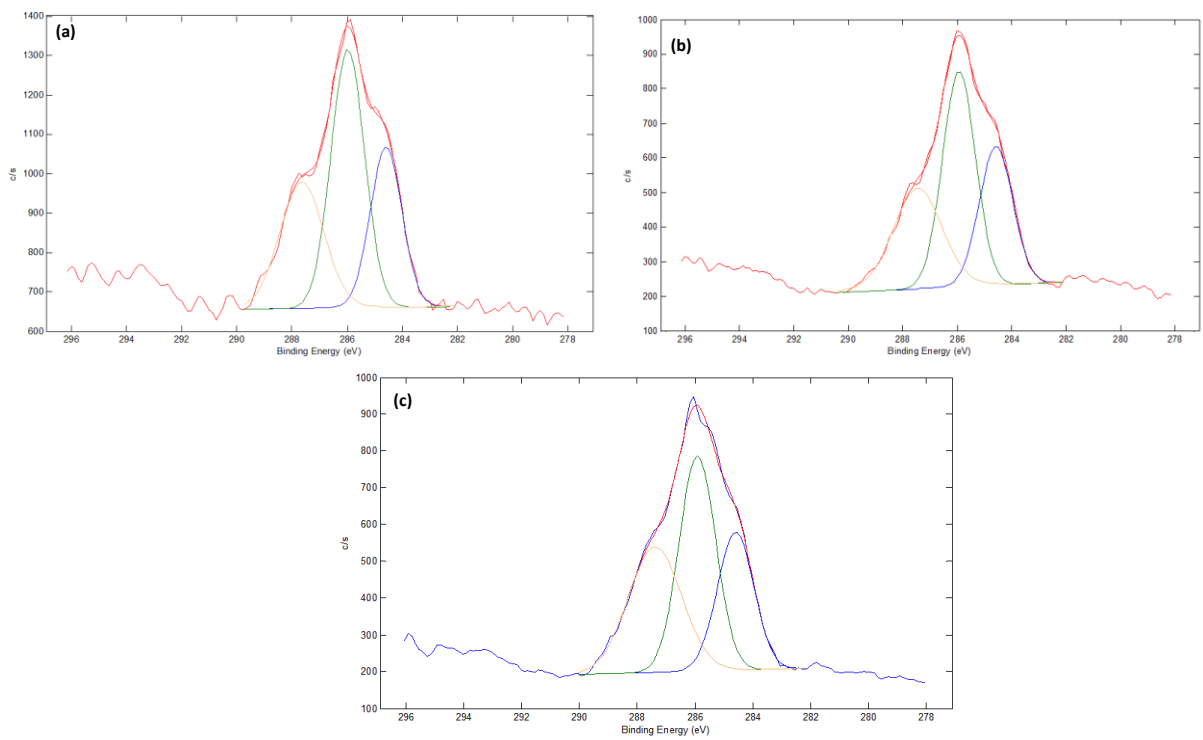

**Figure S11.**

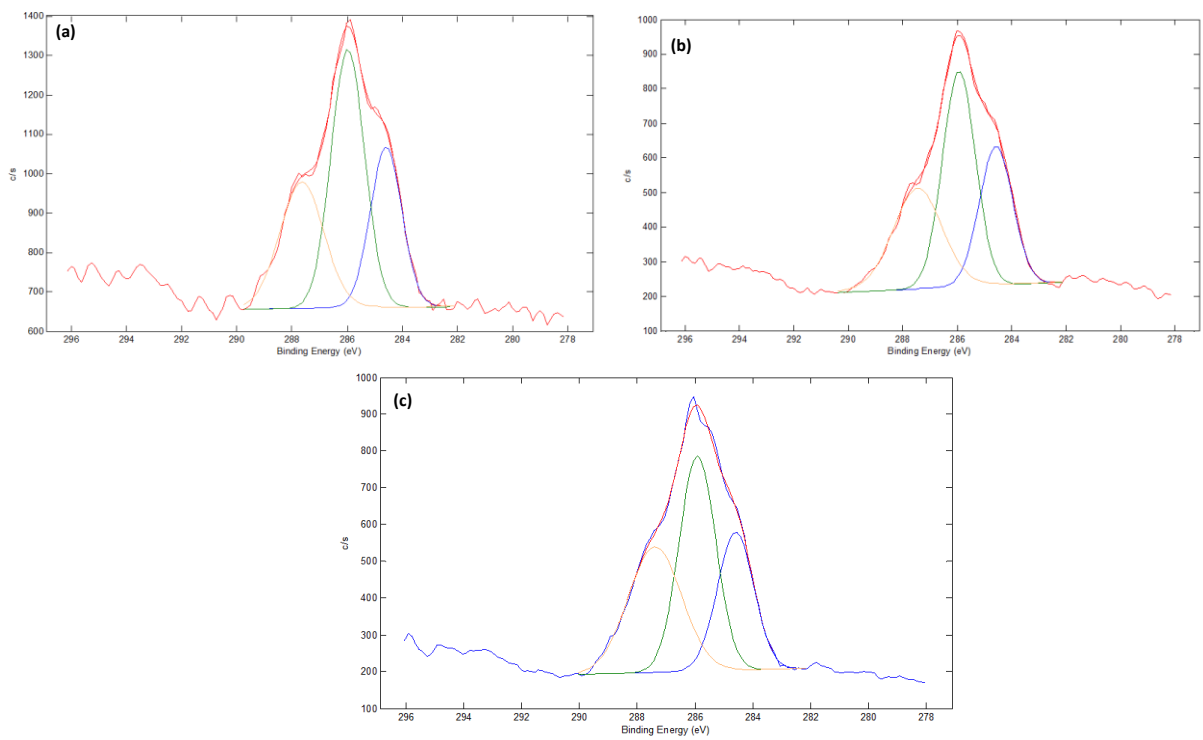

**Figure S12.**

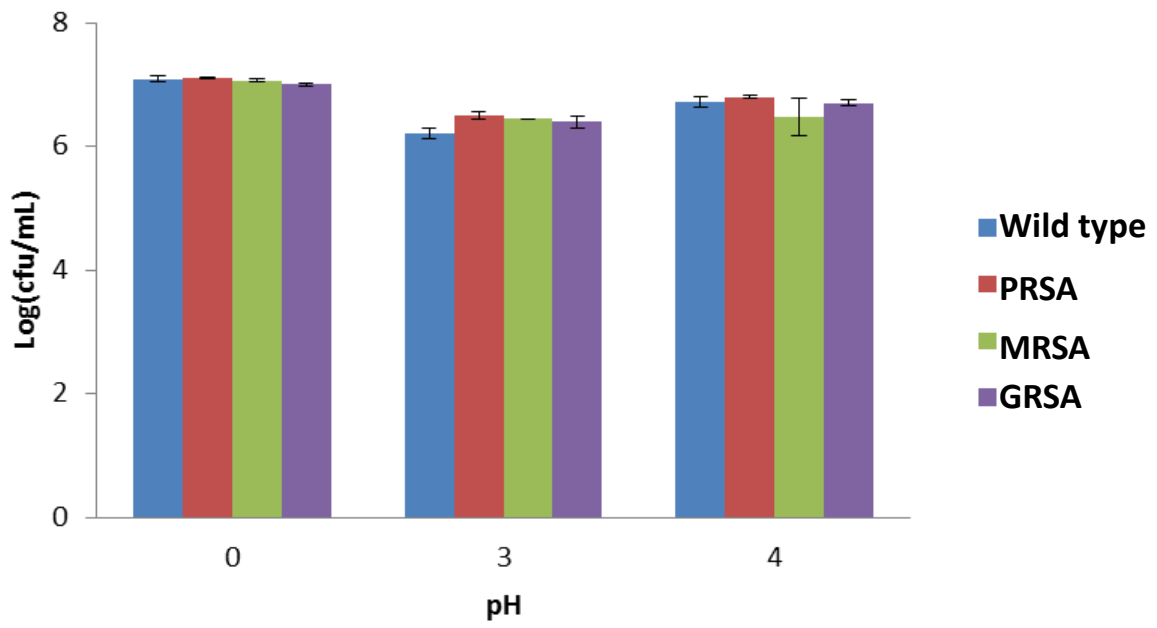

Figure S13.

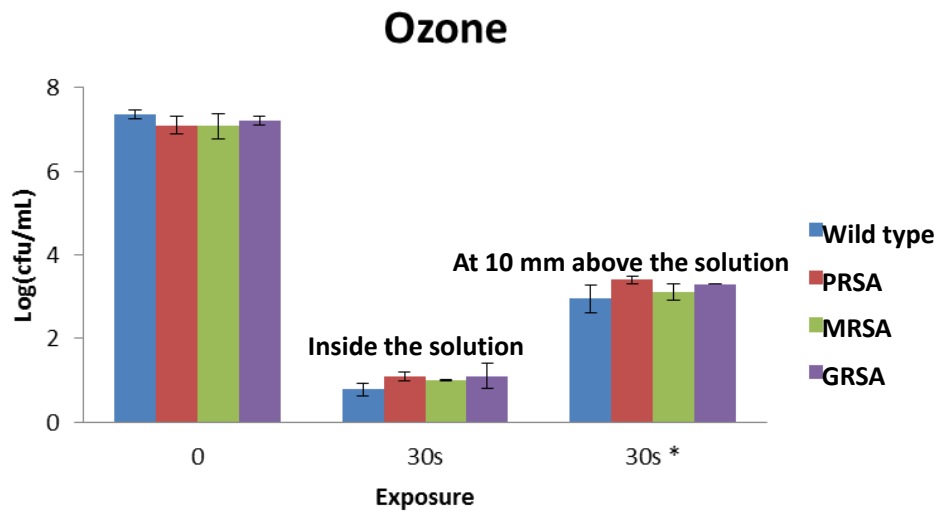

Figure S14.

## Dielectric Barrier Discharge (DBD) plasma

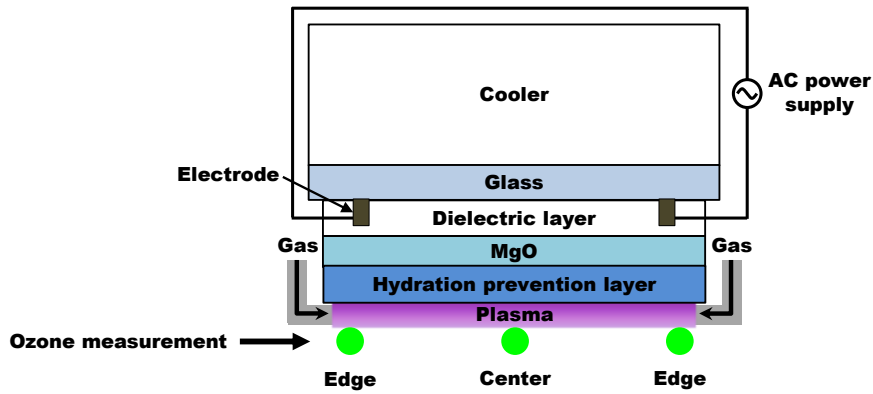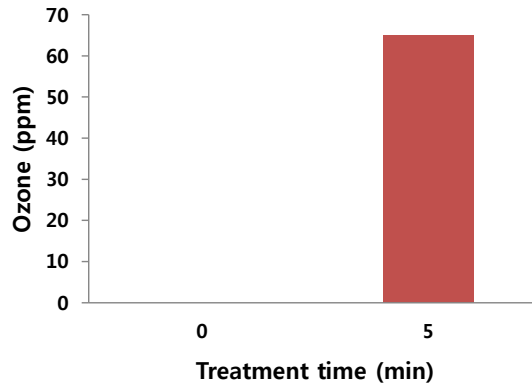

Figure S15.

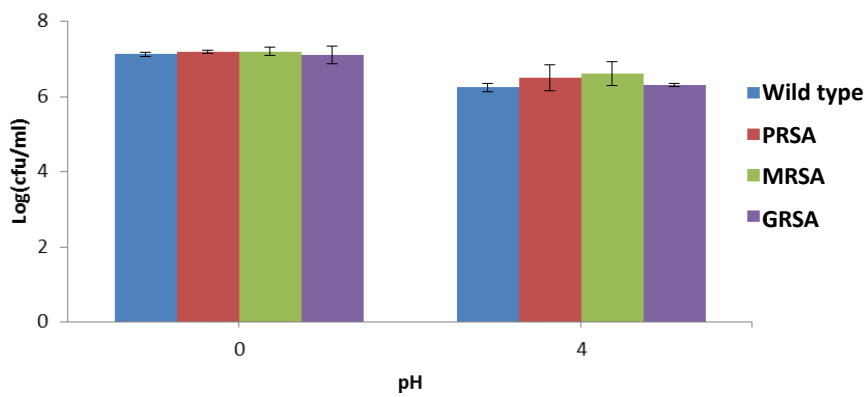

Figure S16.
